# Supplementary material for: Phosphorylated Osteopontin Secreted from Cancer Cells Induces Cancer Cell Motility
Source: MDPI journal article supplement (doi:10.3390/biom11091323), 2021-09-07
Supplement: s1 [file s1]

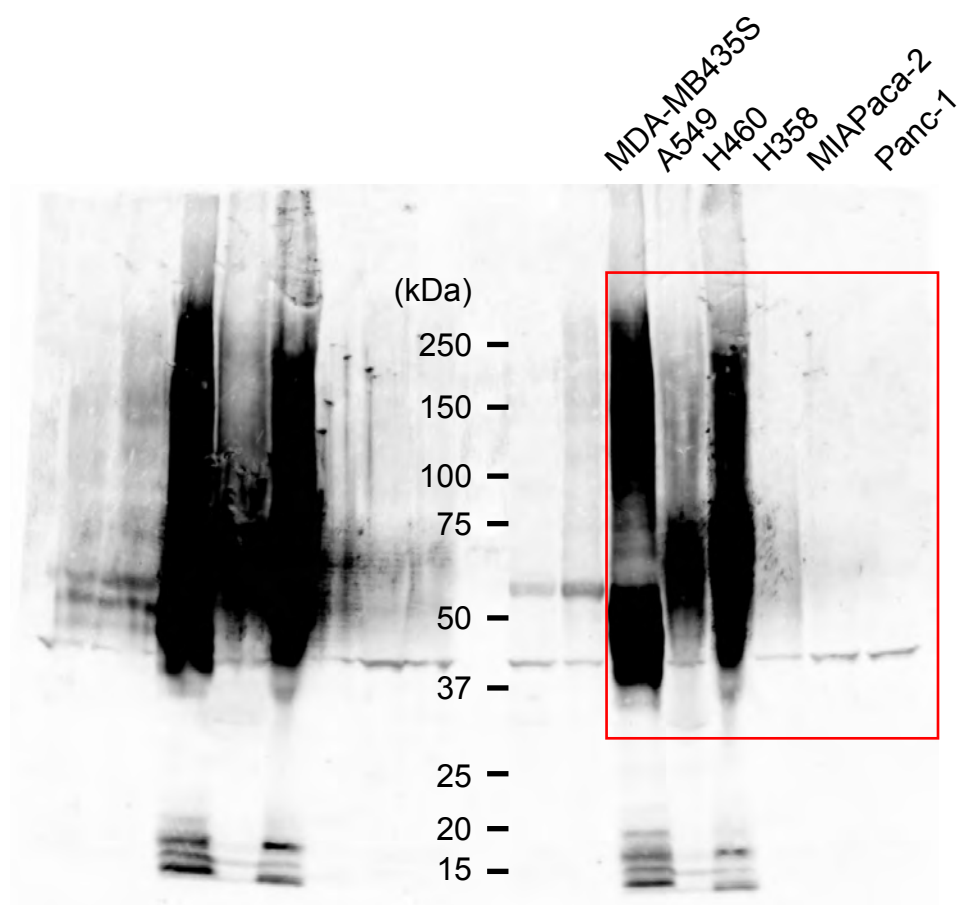

**Supplementary Figure S1. Unprocessed blot image in Fig. 1b.**  
Red square indicates cropped section.

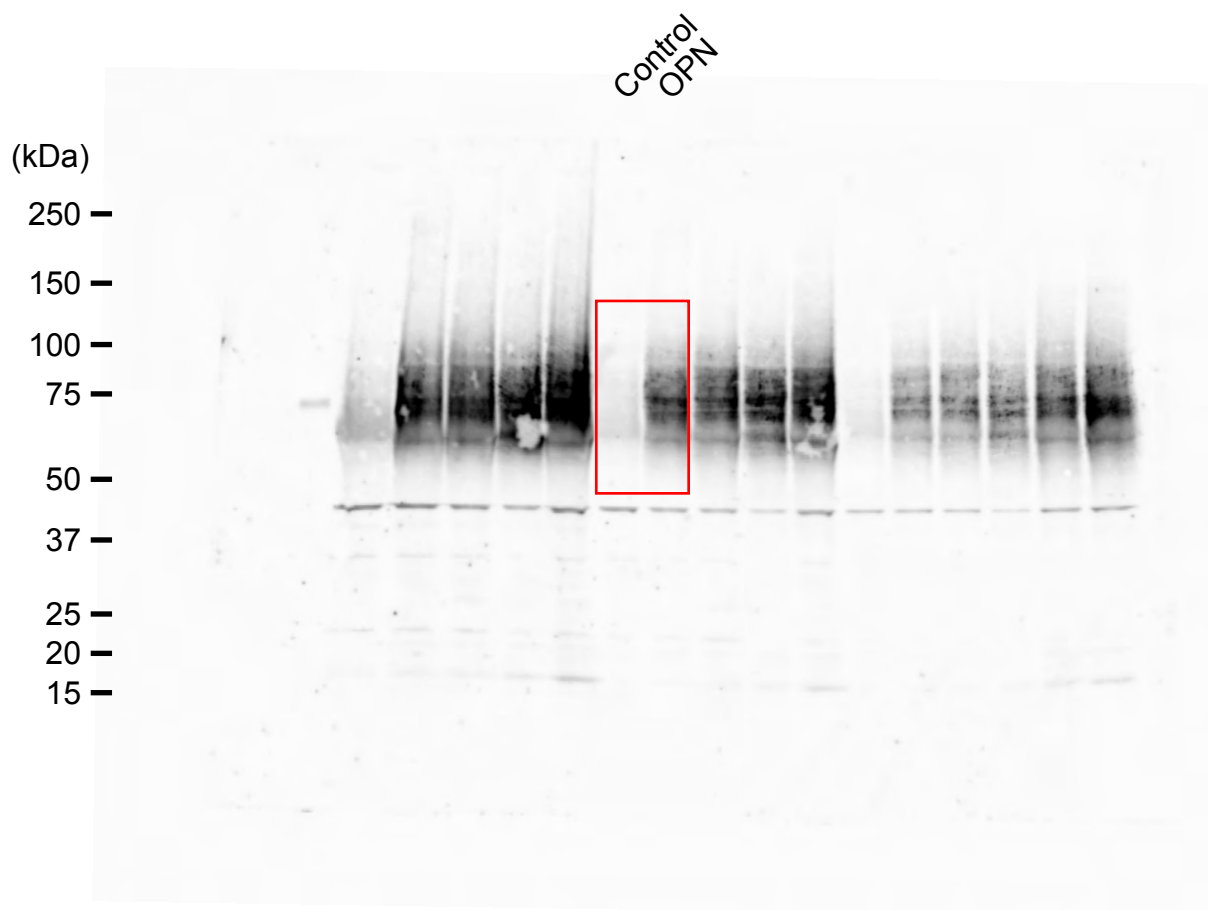

**Supplementary Figure S2. Unprocessed blot image in Fig. 3a.**  
Red square indicates cropped section.

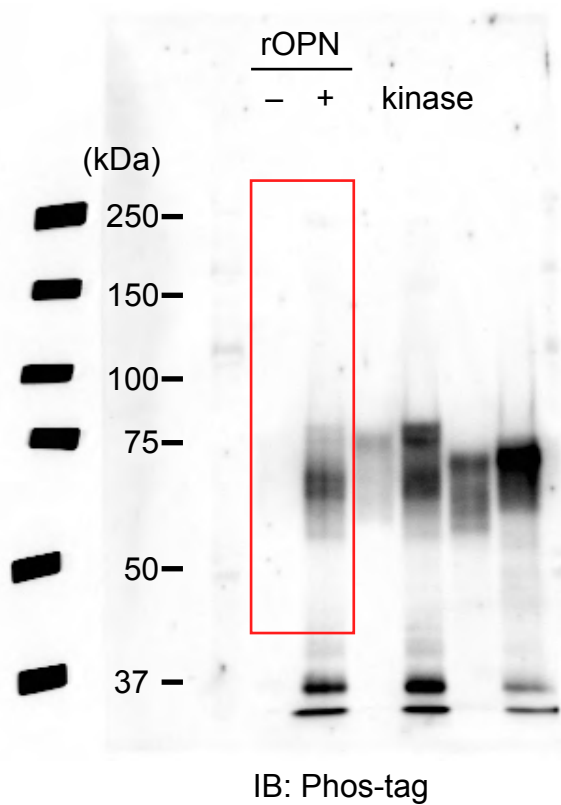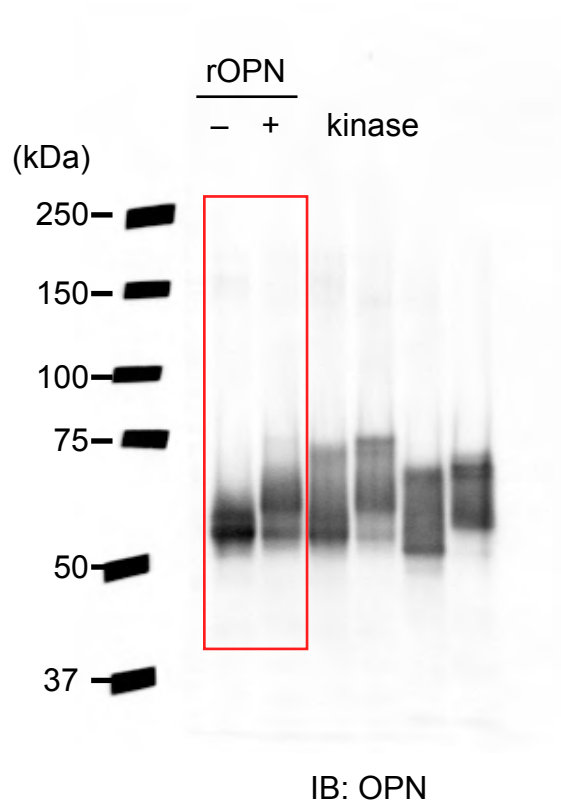

**Supplementary Figure S3. Unprocessed blot image in Fig. 6a.**  
Red square indicates cropped section.
